# Supplementary material for: In vivo effect of two first-line ART regimens on inflammatory mediators in male HIV patients
Source: PubMed Central journal article supplement (PMC4055908; doi:10.1186/1476-511x-13-90), 2014-05-29
Supplement: 1476-511X-13-90-S3.pdf [file 1476-511X-13-90-S3.pdf]

## Additional File 3: Cytokines and VEGF levels in HIV-infected patients.

| Cytokines (pg/mL) | Groups | Baseline (0 month)       | 1 <sup>st</sup> month                 | 3 <sup>rd</sup> month   | 6 <sup>th</sup> month   | 9 <sup>th</sup> month  | 12 <sup>th</sup> month  | P <sub>time</sub> | P <sub>int</sub> |
|-------------------|--------|--------------------------|---------------------------------------|-------------------------|-------------------------|------------------------|-------------------------|-------------------|------------------|
| IL-1 $\beta$      | T      | 59.6<br>(42.4 - 75.8)    | 42.3<br>(26.5 - 72.8)                 | 68.7<br>(48.5 - 87.1)   | 48.4<br>(40.0 - 69.2)   | 43.7<br>(32.1 - 54.8)  | 59.0<br>(38.1 - 78.6)   | 0.323             | 0.060            |
|                   | A      | 71.7<br>(19.5 - 97.4)    | 64.1<br>(41.6 - 106.8)                | 88.4<br>(44.1 - 127.0)  | 40.6<br>(36.3 - 134.4)  | 39.6<br>(25.9 - 69.0)  | 53.3<br>(30.2 - 103.2)  | 0.276             |                  |
| IL-6              | T      | 44.5<br>(16.0 - 66.4)    | 76.6<br>(25.9 - 339.1)                | 33.6<br>(12.6 - 202.1)  | 34.1<br>(16.4 - 109.0)  | 44.5<br>(19.4 - 167.7) | 86.9<br>(49.9 - 186.7)  | 0.505             | 0.173            |
|                   | A      | 49.9<br>(23.5 - 153.3)   | 63.2<br>(10.4 - 170.8)                | 89.4<br>(14.6 - 260.0)  | 49.9<br>(20.2 - 91.1)   | 52.9<br>(12.4 - 115.6) | 65.2<br>(43.0 - 165.5)  | 0.909             |                  |
| IL-10             | T      | 40.6<br>(14.9 - 135.5)   | 53.2<br>(20.8 - 89.4)                 | 30.9<br>(16.0 - 101.9)  | 61.4<br>(25.1 - 140.4)  | 33.7<br>(13.2 - 76.3)  | 30.9<br>(18.9 - 105.9)  | 0.905             | 0.137            |
|                   | A      | 22.0<br>(15.7 - 71.7)    | 92.1<br>(24.6 - 133.22)               | 52.7<br>(21.6 - 137.8)  | 31.1<br>(25.8 - 64.6)   | 33.7<br>(17.3 - 81.0)  | 38.5<br>(10.3 - 57.2)   | 0.478             |                  |
| TNF $\alpha$      | T      | 206.1<br>(116.3 - 310.2) | 154.41<br>(57.74 - 210.9)             | 221.7<br>(72.4 - 463.3) | 121.1<br>(81.6 - 420.5) | 90.3<br>(61.3 - 248.8) | 77.6<br>(52.3 - 216.4)  | 0.539             | 0.136            |
|                   | A      | 130.3<br>(71.2 - 281.7)  | 205.4 <sup>*</sup><br>(158.5 - 462.1) | 202.6<br>(80.8 - 366.7) | 128.5<br>(90.1 - 298.2) | 91.4<br>(61.3 - 230.4) | 95.3<br>(70.5 - 145.0)  | 0.183             |                  |
| IL-12p70          | T      | 53.1<br>(34.5 - 193.1)   | 111.0<br>(35.9 - 208.9)               | 62.8<br>(18.8 - 159.9)  | 87.7<br>(36.2 - 289.2)  | 38.0<br>(26.5 - 158.3) | 67.1<br>(34.5 - 94.3)   | 0.778             | 0.104            |
|                   | A      | 21.3<br>(5.0 - 217.0)    | 122.8<br>(42.1 - 243.2)               | 137.0<br>(38.2 - 217.3) | 149.0<br>(26.7 - 259.5) | 65.9<br>(41.1 - 150.0) | 52.0<br>(18.77- 150.58) | 0.483             |                  |
| VEGF              | T      | 5.9<br>(0.2 - 22.3)      | 13.5<br>(1.7 - 27.1)                  | 5.3<br>(3.6 - 24.0)     | 8.9<br>(1.6 - 14.3)     | 11.7<br>(1.2 - 18.4)   | 9.7<br>(0.7 - 18.5)     | 0.991             | 0.200            |
|                   | A      | 14.3<br>(2.3 - 28.0)     | 9.5<br>(3.1 - 12.0)                   | 8.3<br>(0.2 - 17.7)     | 11.1<br>(6.3 - 15.6)    | 16.8<br>(5.1 - 27.8)   | 6.7<br>(1.0 - 12.0)     | 0.314             |                  |

Group\_T: tenofovir-DF/emtricitabine/ efavirenz, Group\_A: abacavir/lamivudine/ efavirenz. All the results are expressed as median values and interquartile range (25<sup>th</sup>-75<sup>th</sup>).

$p_{\text{time}}$  and  $P_{\text{int}}$  display the difference within each groups or between the two groups during the overall 12-month treatment, respectively

\*: displays the significant difference of each time point with the baseline value ( $p < 0.05$ ).
